# Supplementary material
Source: PubMed Central journal article supplement (PMC4855261)

**RBC Mean Cell Volume**

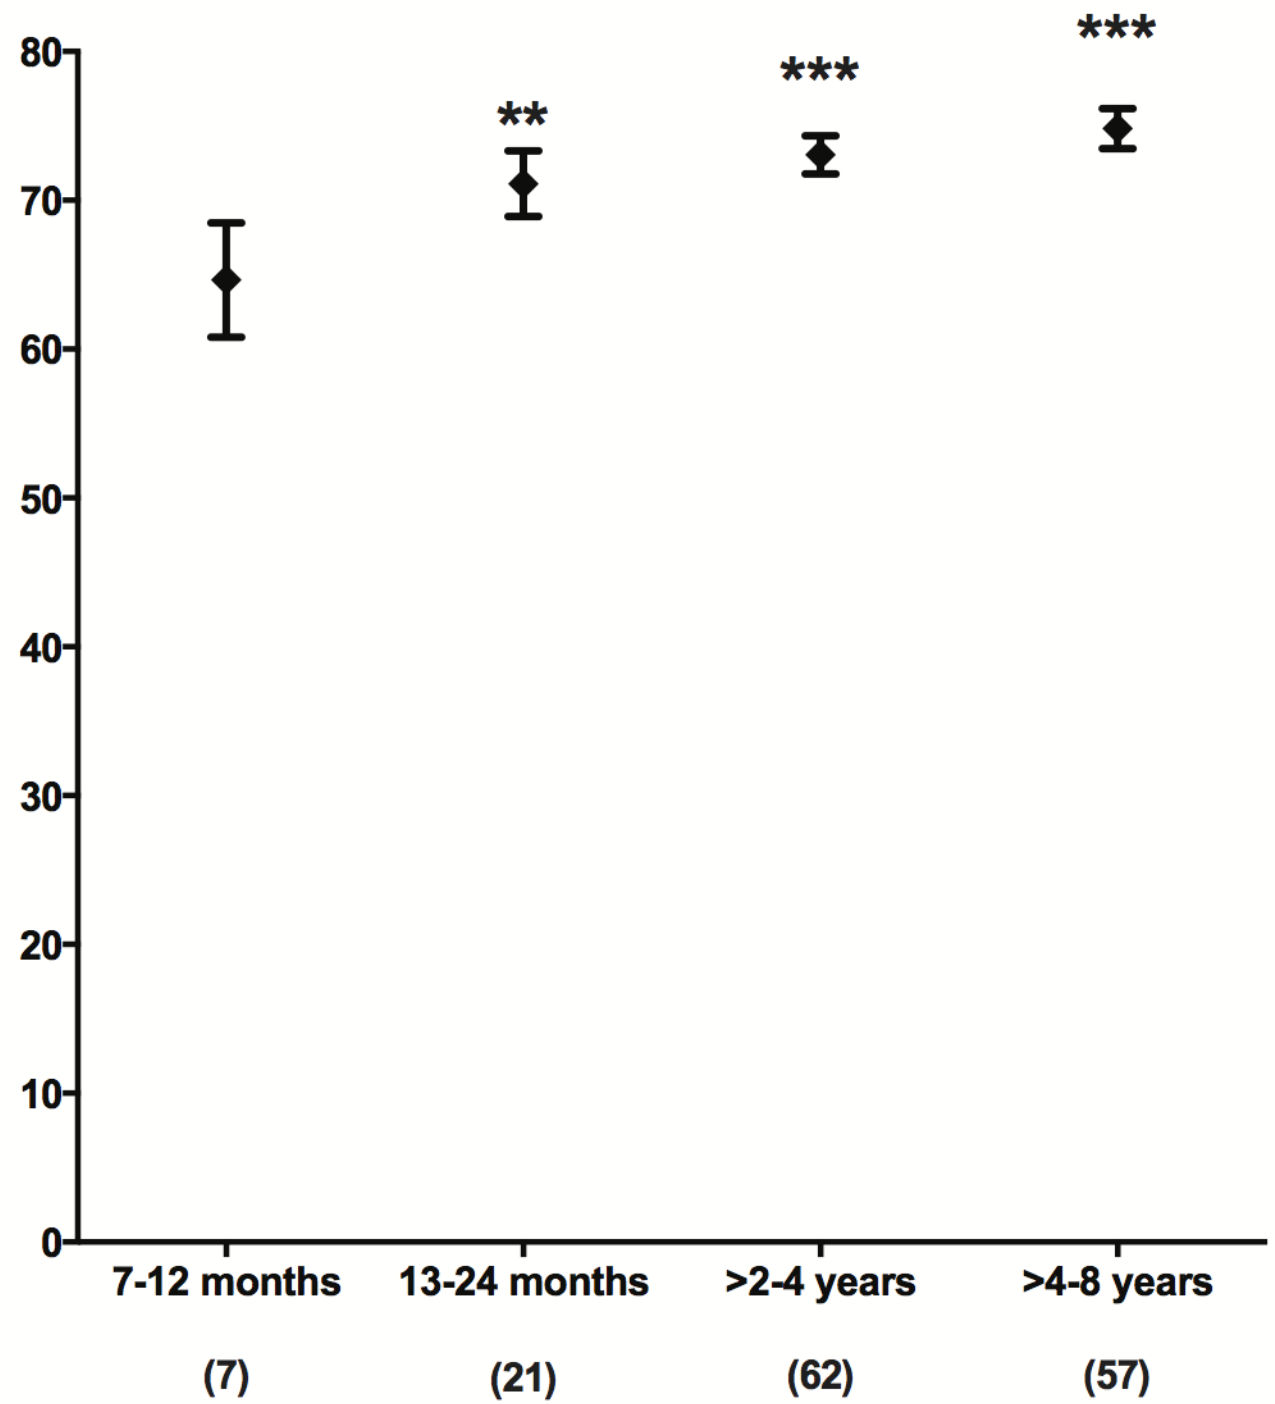

Supplement: gene20162x1.pdf [file gene20162x1.pdf]
